# Supplementary material for: Genome Sequencing Highlights the Dynamic Early History of Dogs
Source: PubMed Central journal article supplement (PMC3894170; doi:10.1371/journal.pgen.1004016), 2014-01-16

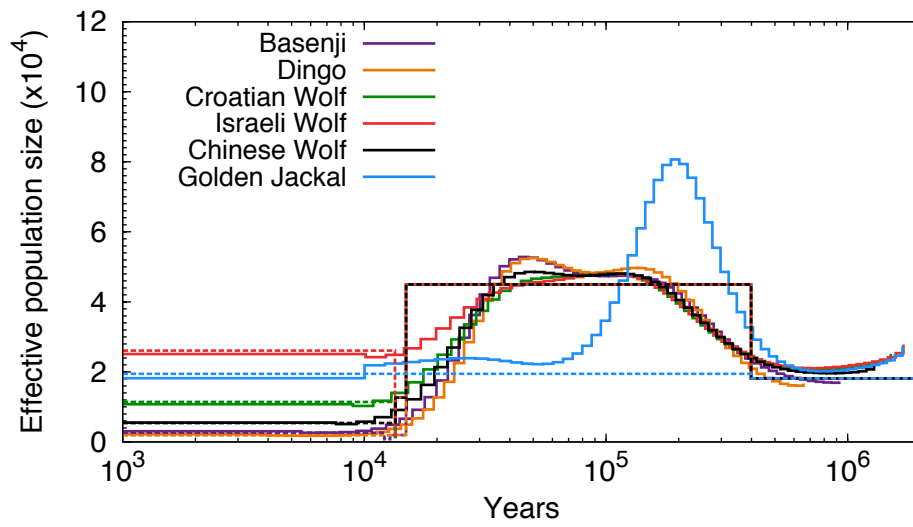

Supplement: pgen.1004016.s002.pdf [file pgen.1004016.s002.pdf]
