# Supplementary material for: Genome Sequencing Highlights the Dynamic Early History of Dogs
Source: PubMed Central journal article supplement (PMC3894170; doi:10.1371/journal.pgen.1004016), 2014-01-16
Supplement: pgen.1004016.s007.pdf [file pgen.1004016.s007.pdf]

**Table S1.** Sequence data generated, rate of PCR duplicates, alignment statistics, and mean depth of coverage per sample.

|                                     | <b>Basenji</b> | <b>Dingo</b> | <b>Israeli wolf</b> | <b>Chinese wolf</b> | <b>Croatian wolf</b> | <b>Golden jackal</b> |
|-------------------------------------|----------------|--------------|---------------------|---------------------|----------------------|----------------------|
| Total reads <sup>a</sup>            | 969.0          | 2194.5       | 1803.5              | 694.0               | 2180.8               | 3365.8               |
| Reads aligned <sup>a</sup>          | 816.6          | 1602.2       | 1249.5              | 652.7               | 1464.5               | 2437.8               |
| % Reads aligned                     | 84.3           | 73.0         | 69.3                | 94.0                | 67.2                 | 72.4                 |
| % PCR duplicates                    | 28.5           | 28.5         | 20.2                | 3.2                 | 16.0                 | 51.5                 |
| Uniquely aligned reads <sup>a</sup> | 581.3          | 1145.5       | 997.3               | 632.0               | 1229.8               | 1181.8               |
| Uniquely aligned bases (Gb)         | 28.1           | 70.7         | 52.7                | 61.3                | 62.4                 | 59.5                 |
| Mean coverage                       | 12.6x          | 25.75x       | 21.6x               | 24.6x               | 25.3x                | 23.8x                |

<sup>a</sup> Millions of reads
