# Supplementary material for: Genome Sequencing Highlights the Dynamic Early History of Dogs
Source: PubMed Central journal article supplement (PMC3894170; doi:10.1371/journal.pgen.1004016), 2014-01-16
Supplement: pgen.1004016.s008.pdf [file pgen.1004016.s008.pdf]

**Table S2.** Percentage of genome genotyped and containing variants.

| Sample        | Unfiltered       |                  | GF1 <sup>b</sup> |                  | GF2 <sup>c</sup> |                  | GF3 <sup>d</sup> |                  | SF <sup>e</sup>  |                  | GF1+SF           |                  | GF2+SF           |                  | GF3+SF             |                  |
|---------------|------------------|------------------|------------------|------------------|------------------|------------------|------------------|------------------|------------------|------------------|------------------|------------------|------------------|------------------|--------------------|------------------|
|               | All <sup>a</sup> | SNV <sup>f</sup> | All <sup>a</sup> | SNV <sup>f</sup> | All <sup>a</sup> | SNV <sup>f</sup> | All <sup>a</sup> | SNV <sup>f</sup> | All <sup>a</sup> | SNV <sup>f</sup> | All <sup>a</sup> | SNV <sup>f</sup> | All <sup>a</sup> | SNV <sup>f</sup> | All <sup>a,g</sup> | SNV <sup>f</sup> |
| Basenji       | 96.81            | 0.21             | 54.89            | 0.14             | 67.13            | 0.14             | 68.61            | 0.19             | 74.63            | 0.18             | 43.95            | 0.13             | 54.43            | 0.13             | 55.31              | 0.17             |
| Dingo         | 97.44            | 0.22             | 55.29            | 0.14             | 67.58            | 0.15             | 69.09            | 0.19             | 87.81            | 0.18             | 51.31            | 0.12             | 63.23            | 0.13             | 64.37              | 0.17             |
| Israeli wolf  | 97.45            | 0.30             | 55.33            | 0.20             | 67.60            | 0.20             | 69.13            | 0.27             | 91.10            | 0.26             | 52.62            | 0.18             | 64.66            | 0.18             | 65.89              | 0.24             |
| Croatian wolf | 95.98            | 0.28             | 54.56            | 0.20             | 66.79            | 0.20             | 68.22            | 0.26             | 86.33            | 0.25             | 50.33            | 0.18             | 62.16            | 0.18             | 63.21              | 0.24             |
| Chinese wolf  | 98.37            | 0.30             | 55.72            | 0.20             | 68.05            | 0.20             | 69.61            | 0.27             | 95.59            | 0.25             | 54.59            | 0.17             | 66.72            | 0.17             | 68.22              | 0.24             |
| Golden jackal | 96.88            | 0.46             | 55.18            | 0.32             | 67.45            | 0.32             | 68.95            | 0.43             | 88.11            | 0.38             | 51.42            | 0.27             | 63.37            | 0.28             | 64.50              | 0.37             |

<sup>a</sup> Proportion of the genome measured with respect to all 2194412237 non-'N' bases in the reference.

<sup>b</sup> Genome level filter, hard masking all repeats identified with RepeatMasker, CNVs, and CpG sites.

<sup>c</sup> Genome level filter, excluding CNVs, young repeat elements, and CpG sites.

<sup>d</sup> Genome level filter allowing CpG sites, used for analyses of genic regions.

<sup>e</sup> Sample level filter: minimum genotype quality=20, max. depth of coverage ≤ 2x the mean

<sup>f</sup> Percentage of sites passing the filter that contain a non-reference allele. Additional filters exclude SNVs within 5bp of another, and SNVs within 5bp of indels.

<sup>g</sup> Proportions of GF3 masked sites genotyped are 78.76% (Basenji), 91.67% (Dingo), 93.84% (Israeli wolf), 90.03% (Croatian wolf), 97.16% (Chinese wolf), and 91.85% (Golden jackal).
