# Supplementary material for: Genome Sequencing Highlights the Dynamic Early History of Dogs
Source: PubMed Central journal article supplement (PMC3894170; doi:10.1371/journal.pgen.1004016), 2014-01-16
Supplement: pgen.1004016.s009.pdf [file pgen.1004016.s009.pdf]

**Table S3.** Counts of variant site configurations at sites with no missing data.

| <b>Site Configuration</b>                  | <b>Count</b> |
|--------------------------------------------|--------------|
| Shared between dogs and wolves             | 1524761      |
| Fixed between dogs and wild canids         | 16604        |
| Fixed between dogs and wolves <sup>a</sup> | 7525         |
| In dogs but not wolves                     | 428339       |
| In wolves but not dogs                     | 867656       |
| Basenji-specific                           | 274063       |
| Dingo-specific                             | 261352       |
| Israeli wolf-specific                      | 473669       |
| Croatian wolf-specific                     | 460000       |
| Chinese wolf-specific                      | 451104       |
| Golden jackal-specific                     | 2205599      |
| Total                                      | 6970672      |

<sup>a</sup> Jackal either fixed or polymorphic for the dog allele.
