# Supplementary material for: Genome Sequencing Highlights the Dynamic Early History of Dogs
Source: PubMed Central journal article supplement (PMC3894170; doi:10.1371/journal.pgen.1004016), 2014-01-16
Supplement: pgen.1004016.s010.pdf [file pgen.1004016.s010.pdf]

**Table S4.** Concordance between high-quality Illumina array genotypes and genotypes obtained from genotyping pipeline. Proportions are normalized by row, reflecting concordance conditional on the chip genotype, based upon sites that passed GF3 and SF.

|                      |                     | Sequencing Genotypes |         |         |         |       |
|----------------------|---------------------|----------------------|---------|---------|---------|-------|
|                      |                     | 0/0                  | 0/1     | 1/1     | Total   |       |
| Array Genotypes      | <b>Basenji</b>      | <b>0/0</b>           | 0.9997  | 0.0003  | 0.0000  | 38412 |
|                      |                     | <b>0/1</b>           | 0.0020  | 0.9966  | 0.0013  | 16734 |
|                      |                     | <b>1/1</b>           | 0.0001  | 0.0022  | 0.9976  | 30330 |
|                      | <b>Dingo</b>        | <b>0/0</b>           | 0.9998  | 0.0002  | 0.00002 | 47010 |
|                      |                     | <b>0/1</b>           | 0.0008  | 0.9990  | 0.0002  | 11766 |
|                      |                     | <b>1/1</b>           | 0.0003  | 0.0007  | 0.9990  | 38932 |
|                      | <b>Israeli wolf</b> | <b>0/0</b>           | 0.9993  | 0.0006  | 0.0001  | 39245 |
|                      | <b>0/1</b>          | 0.0010               | 0.9985  | 0.0002  | 26115   |       |
|                      | <b>1/1</b>          | 0.0003               | 0.0029  | 0.9967  | 32263   |       |
| <b>Croatian wolf</b> | <b>0/0</b>          | 0.9994               | 0.0005  | 0.0001  | 40510   |       |
|                      | <b>0/1</b>          | 0.0017               | 0.9982  | 0.0001  | 21156   |       |
|                      | <b>1/1</b>          | 0.0003               | 0.004   | 0.9955  | 33582   |       |
| <b>Chinese Wolf</b>  | <b>0/0</b>          | 0.9997               | 0.00024 | 0.00002 | 42234   |       |
|                      | <b>0/1</b>          | 0.0012               | 0.9987  | 0.00005 | 18466   |       |
|                      | <b>1/1</b>          | 0.0004               | 0.0005  | 0.9992  | 37006   |       |
| <b>Golden jackal</b> | <b>0/0</b>          | 0.9995               | 0.0003  | 0.0002  | 47779   |       |
|                      | <b>0/1</b>          | 0.0032               | 0.9942  | 0.0026  | 6906    |       |
|                      | <b>1/1</b>          | 0.0005               | 0.0042  | 0.9953  | 40606   |       |
