# Supplementary material for: Genome Sequencing Highlights the Dynamic Early History of Dogs
Source: PubMed Central journal article supplement (PMC3894170; doi:10.1371/journal.pgen.1004016), 2014-01-16
Supplement: pgen.1004016.s011.pdf [file pgen.1004016.s011.pdf]

**Table S5.** Estimated heterozygote discordance rates and reference bias in genotypes called from sequencing relative to genotypes called on the Illumina CanineHD BeadChip.

| Sample        | Heterozygote<br>discordance per bp | Reference bias       |                              |                           |
|---------------|------------------------------------|----------------------|------------------------------|---------------------------|
|               |                                    | Overall <sup>a</sup> | 0/1 to 0/0 only <sup>b</sup> | Towards/Away <sup>c</sup> |
| Basenji       | $3.4 \times 10^{-4}$               | 0.0023               | 0.0021                       | 3.24                      |
| Dingo         | $1.0 \times 10^{-4}$               | 0.0010               | 0.0009                       | 4.08                      |
| Israeli wolf  | $1.5 \times 10^{-4}$               | 0.0024               | 0.0013                       | 4.34                      |
| Croatian wolf | $1.3 \times 10^{-4}$               | 0.0034               | 0.0017                       | 6.93                      |
| Chinese wolf  | $1.8 \times 10^{-4}$               | 0.0010               | 0.0012                       | 4.50                      |
| Golden jackal | $5.8 \times 10^{-4}$               | 0.0045               | 0.0032                       | 5.35                      |

<sup>a</sup> Frequency of all errors made in the direction of the reference, excluding errors in the opposite direction.

<sup>b</sup> Only considering errors towards the reference made at sites called heterozygous on the chip.

<sup>c</sup> Ratio of errors towards reference to errors away from reference.
