# Supplementary material for: Genome Sequencing Highlights the Dynamic Early History of Dogs
Source: PubMed Central journal article supplement (PMC3894170; doi:10.1371/journal.pgen.1004016), 2014-01-16
Supplement: pgen.1004016.s012.pdf [file pgen.1004016.s012.pdf]

**Table S6.** Autosomal heterozygosity for six canid genomes.

| <b>Sample</b> | <b><i>N</i></b> | <b>Heterozygosity<sup>a</sup></b> |
|---------------|-----------------|-----------------------------------|
| Basenji       | 1213620321      | 0.00086±1.65*10 <sup>-6</sup>     |
| Dingo         | 1412511207      | 0.00057±1.25*10 <sup>-6</sup>     |
| Israeli wolf  | 1445995509      | 0.00162±2.07*10 <sup>-6</sup>     |
| Croatian wolf | 1387203642      | 0.00143±1.99*10 <sup>-6</sup>     |
| Chinese wolf  | 1497066162      | 0.00123±1.78*10 <sup>-6</sup>     |
| Golden jackal | 1415330381      | 0.00148±2.01*10 <sup>-6</sup>     |

<sup>a</sup> Normal approximation binomial confidence interval.
