# Supplementary material for: Genome Sequencing Highlights the Dynamic Early History of Dogs
Source: PubMed Central journal article supplement (PMC3894170; doi:10.1371/journal.pgen.1004016), 2014-01-16
Supplement: pgen.1004016.s014.pdf [file pgen.1004016.s014.pdf]

**Table S8.** Genome-wide pairwise sequence divergence, estimated using equation E8.2 (see Text S8) using all the genomic sites that passed the genomic quality filters outlined in Text S8.

|                      | <b>Boxer</b> | <b>Basenji</b> | <b>Dingo</b> | <b>Israeli wolf</b> | <b>Croatian wolf</b> | <b>Chinese wolf</b> |
|----------------------|--------------|----------------|--------------|---------------------|----------------------|---------------------|
| <b>Boxer</b>         |              |                |              |                     |                      |                     |
| <b>Basenji</b>       | 0.00087      |                |              |                     |                      |                     |
| <b>Dingo</b>         | 0.00094      | 0.00100        |              |                     |                      |                     |
| <b>Israeli wolf</b>  | 0.00111      | 0.00112        | 0.00116      |                     |                      |                     |
| <b>Croatian wolf</b> | 0.00113      | 0.00117        | 0.00116      | 0.00115             |                      |                     |
| <b>Chinese wolf</b>  | 0.00114      | 0.00117        | 0.00115      | 0.00118             | 0.00115              |                     |
| <b>Golden jackal</b> | 0.00211      | 0.00214        | 0.00214      | 0.00214             | 0.00214              | 0.00214             |
