# Supplementary material for: Genome Sequencing Highlights the Dynamic Early History of Dogs
Source: PubMed Central journal article supplement (PMC3894170; doi:10.1371/journal.pgen.1004016), 2014-01-16
Supplement: pgen.1004016.s015.pdf [file pgen.1004016.s015.pdf]

**Table S9.** Estimates of the number of ABBA/BABA/BBAA sites in the six canid genomes. For each cell and each quartet comparison we report the number of ABBA/BABA/BBAA sites followed by the frequency of those three types of sites given that the site is bi-allelic with the two alleles found in two species each. The golden jackal was used as an outgroup in all comparisons.

| <b>P1</b>     | <b>P2</b>     | <b>P3</b>     | <b>ABBA Sites</b> | <b>BABA Sites</b> | <b>BBAA Sites</b> |
|---------------|---------------|---------------|-------------------|-------------------|-------------------|
| Basenji       | Dingo         | Croatian wolf | 164211; 28.43%    | 162364; 28.11%    | 250958; 43.45%    |
| Basenji       | Dingo         | Israeli wolf  | 158610; 27.18%    | 179656; 30.78%    | 245329; 42.04%    |
| Boxer         | Basenji       | Croatian wolf | 144942; 24.82%    | 146113; 25.02%    | 292896; 50.16%    |
| Boxer         | Basenji       | Israeli wolf  | 157007; 26.71%    | 147991; 25.17%    | 282873; 48.12%    |
| Boxer         | Dingo         | Croatian wolf | 177485; 27.15%    | 176031; 26.93%    | 300095; 45.91%    |
| Boxer         | Dingo         | Israeli wolf  | 176511; 26.50%    | 189294; 28.42%    | 300201; 45.07%    |
| Croatian wolf | Israeli wolf  | Boxer         | 226123; 34.16%    | 210897; 31.86%    | 224971; 33.98%    |
| Croatian wolf | Israeli wolf  | Dingo         | 213742; 32.78%    | 212876; 32.65%    | 225351; 34.56%    |
| Croatian wolf | Israeli wolf  | Basenji       | 205695; 35.29%    | 182191; 31.26%    | 194909; 33.44%    |
| Basenji       | Dingo         | Chinese wolf  | 173366; 29.45%    | 162030; 27.52%    | 253270; 43.02%    |
| Boxer         | Basenji       | Chinese wolf  | 149172; 24.91%    | 147273; 24.59%    | 302448; 50.50%    |
| Boxer         | Dingo         | Chinese wolf  | 192400; 28.40%    | 175946; 25.97%    | 309223; 45.64%    |
| Croatian wolf | Chinese wolf  | Boxer         | 216145; 32.52%    | 219859; 33.08%    | 228675; 34.40%    |
| Croatian wolf | Chinese wolf  | Dingo         | 221737; 33.97%    | 212060; 32.49%    | 218959; 33.54%    |
| Croatian wolf | Chinese wolf  | Basenji       | 190706; 32.79%    | 191336; 32.90%    | 199502; 34.31%    |
| Chinese wolf  | Israeli wolf  | Boxer         | 242452; 35.42%    | 222327; 32.48%    | 219803; 32.11%    |
| Chinese wolf  | Israeli wolf  | Dingo         | 223003; 33.37%    | 232071; 34.73%    | 213209; 31.90%    |
| Chinese wolf  | Israeli wolf  | Basenji       | 216213; 36.43%    | 191475; 32.26%    | 185855; 31.31%    |
| Basenji       | Dingo         | Boxer         | 179362; 32.42%    | 216634; 39.16%    | 157265; 28.43%    |
| Chinese Wolf  | Croatian Wolf | Israeli Wolf  | 230181; 34.70%    | 208597; 31.44%    | 224601; 33.86%    |
