# Supplementary material for: Genome Sequencing Highlights the Dynamic Early History of Dogs
Source: PubMed Central journal article supplement (PMC3894170; doi:10.1371/journal.pgen.1004016), 2014-01-16
Supplement: pgen.1004016.s016.pdf [file pgen.1004016.s016.pdf]

**Table S10.** Estimates of the number of ABBA/BABA/BBAA sites in the three *G-PhoCS* models analyzed. For each cell and each quartet comparison we report: 1) The number of ABBA/BABA/BBAA sites; 2) The frequency of those three types of sites given that the site is bi-allelic with the two alleles found in two species each and 3) the difference of that frequency in the simulations minus what is estimated in the data (when this difference is bigger than 1.5%, we highlight the cell in bold). The lower row of the table indicates the fit of the model to the data as estimated by equation 8.7 in Text S8. The golden jackal was used as an outgroup in all comparisons.

| Taxa          |              |               | Fig. 5A model (Model where the dogs and wolves are each a separate clade) |                              |                                                   | Fig. 5B model (Regional domestication model)      |                                                   |                                                   | Fig. 5C model (Origin of dogs from the Israeli wolf) |                                                  |                                                   |
|---------------|--------------|---------------|---------------------------------------------------------------------------|------------------------------|---------------------------------------------------|---------------------------------------------------|---------------------------------------------------|---------------------------------------------------|------------------------------------------------------|--------------------------------------------------|---------------------------------------------------|
| P1            | P2           | P3            | ABBA Sites                                                                | BABA Sites                   | BBAA Sites                                        | ABBA Sites                                        | BABA Sites                                        | BBAA Sites                                        | ABBA Sites                                           | BABA Sites                                       | BBAA Sites                                        |
| Basenji       | Dingo        | Croatian wolf | 177596;<br>28.53%;<br>0.10%                                               | 180202;<br>28.95%;<br>0.84%  | 264624;<br>42.52%;<br>-0.94%                      | 178773;<br>28.94%;<br>0.50%                       | 177186;<br>28.68%;<br>0.57%                       | 261870;<br>42.39%;<br>-1.07%                      | 178434;<br>28.88%;<br>0.45%                          | 177152;<br>28.67%;<br>0.56%                      | 262289;<br>42.45%;<br>-1.00%                      |
| Basenji       | Dingo        | Israeli wolf  | 173506;<br>27.87%;<br>0.69%                                               | 191296;<br>30.72%;<br>-0.06% | 257817;<br>41.41%;<br>-0.63%                      | 173256;<br>27.83%;<br>0.65%                       | 192556;<br>30.93%;<br>0.15%                       | 256705;<br>41.24%;<br>-0.80%                      | 173222;<br>27.82%;<br>0.64%                          | 188792;<br>30.32%;<br>-0.46%                     | 260580;<br>41.85%;<br>-0.18%                      |
| Boxer         | Basenji      | Croatian wolf | 157926;<br>25.24%;<br>0.42%                                               | 158158;<br>25.28%;<br>0.26%  | 309616;<br>49.48%;<br>-0.67%                      | 155013;<br>24.78%;<br>-0.04%                      | 156346;<br>24.99%;<br>-0.03%                      | 314275;<br>50.23%;<br>0.08%                       | 158543;<br>25.42%;<br>0.60%                          | 158872;<br>25.47%;<br>0.45%                      | 306268;<br>49.11%;<br>-1.05%                      |
| Boxer         | Basenji      | Israeli wolf  | 168735;<br>26.93%;<br>0.23%                                               | 155221;<br>24.78%;<br>-0.40% | 302524;<br>48.29%;<br>0.17%                       | 165943;<br>26.52%;<br>-0.19%                      | 155130;<br>24.79%;<br>-0.38%                      | 304670;<br>48.69%;<br>0.57%                       | 167349;<br>26.80%;<br>0.09%                          | 155402;<br>24.89%;<br>-0.29%                     | 301725;<br>48.32%;<br>0.20%                       |
| Boxer         | Dingo        | Croatian wolf | 172541;<br>27.69%;<br>0.53%                                               | 175379;<br>28.14%;<br>1.21%  | <b>275228;</b><br><b>44.17%;</b><br><b>-1.75%</b> | <b>148908;</b><br><b>23.69%;</b><br><b>-3.47%</b> | <b>148654;</b><br><b>23.64%;</b><br><b>-3.29%</b> | <b>331136;</b><br><b>52.67%;</b><br><b>6.76%</b>  | 172536;<br>27.92%;<br>0.76%                          | 171583;<br>27.76%;<br>0.83%                      | <b>273917;</b><br><b>44.32%;</b><br><b>-1.59%</b> |
| Boxer         | Dingo        | Israeli wolf  | 173388;<br>27.77%;<br>1.27%                                               | 177664;<br>28.45%;<br>0.03%  | 273358;<br>43.78%;<br>-1.30%                      | <b>147173;</b><br><b>23.27%;</b><br><b>-3.24%</b> | <b>155660;</b><br><b>24.61%;</b><br><b>-3.82%</b> | <b>329753;</b><br><b>52.13%;</b><br><b>7.05%</b>  | 171562;<br>27.53%;<br>1.03%                          | 175185;<br>28.11%;<br>-0.31%                     | 276446;<br>44.36%;<br>-0.72%                      |
| Croatian wolf | Israeli wolf | Boxer         | 205879;<br>33.27%;<br>-0.89%                                              | 201724;<br>32.60%;<br>0.74%  | 211157;<br>34.13%;<br>0.14%                       | 208604;<br>33.71%;<br>-0.44%                      | 200215;<br>32.36%;<br>0.50%                       | 209921;<br>33.93%;<br>-0.06%                      | 208423;<br>33.80%;<br>-0.36%                         | <b>207350;</b><br><b>33.62%;</b><br><b>1.76%</b> | 200941;<br>32.58%;<br>-1.40%                      |
| Croatian wolf | Israeli wolf | Dingo         | 203877;<br>32.96%;<br>0.18%                                               | 201160;<br>32.53%;<br>-0.13% | 213431;<br>34.51%;<br>-0.06%                      | 202216;<br>32.78%;<br>0.00%                       | 202568;<br>32.84%;<br>0.19%                       | 212020;<br>34.37%;<br>-0.19%                      | 205800;<br>33.35%;<br>0.57%                          | 209303;<br>33.92%;<br>1.27%                      | <b>201941;</b><br><b>32.73%;</b><br><b>-1.84%</b> |
| Croatian wolf | Israeli wolf | Basenji       | 215597;<br>34.74%;<br>-0.56%                                              | 197696;<br>31.85%;<br>0.59%  | 207361;<br>33.41%;<br>-0.03%                      | 216547;<br>34.95%;<br>-0.35%                      | 196012;<br>31.63%;<br>0.37%                       | 207051;<br>33.42%;<br>-0.03%                      | 216467;<br>35.11%;<br>-0.19%                         | <b>203118;</b><br><b>32.94%;</b><br><b>1.68%</b> | 197038;<br>31.95%;<br>-1.49%                      |
| Basenji       | Dingo        | Chinese wolf  | 188009;<br>30.16%;<br>0.71%                                               | 177552;<br>28.49%;<br>0.96%  | <b>257728;</b><br><b>41.35%;</b><br><b>-1.67%</b> | 188470;<br>30.47%;<br>1.02%                       | 174988;<br>28.29%;<br>0.77%                       | <b>254996;</b><br><b>41.23%;</b><br><b>-1.79%</b> | 185253;<br>29.98%;<br>0.53%                          | 173424;<br>28.06%;<br>0.54%                      | 259312;<br>41.96%;<br>-1.06%                      |
| Boxer         | Basenji      | Chinese wolf  | 160801;<br>25.64%;<br>0.74%                                               | 158007;<br>25.20%;<br>0.61%  | 308245;<br>49.16%;<br>-1.34%                      | 156840;<br>25.13%;<br>0.22%                       | 155804;<br>24.97%;<br>0.37%                       | 311426;<br>49.90%;<br>-0.60%                      | 157369;<br>25.29%;<br>0.38%                          | 159053;<br>25.56%;<br>0.97%                      | 305845;<br>49.15%;<br>-1.35%                      |

|               |               |              |                                                   |                              |                                                   |                                                   |                                                   |                                                   |                              |                             |                                                   |
|---------------|---------------|--------------|---------------------------------------------------|------------------------------|---------------------------------------------------|---------------------------------------------------|---------------------------------------------------|---------------------------------------------------|------------------------------|-----------------------------|---------------------------------------------------|
| Boxer         | Dingo         | Chinese wolf | 184167;<br>29.48%;<br>1.09%                       | 170916;<br>27.36%;<br>1.40%  | <b>269545;</b><br><b>43.15%;</b><br><b>-2.48%</b> | <b>159174;</b><br><b>25.32%;</b><br><b>-3.08%</b> | <b>144656;</b><br><b>23.01%;</b><br><b>-2.96%</b> | <b>324831;</b><br><b>51.67%;</b><br><b>6.03%</b>  | 178856;<br>28.94%;<br>0.55%  | 168711;<br>27.30%;<br>1.33% | <b>270441;</b><br><b>43.76%;</b><br><b>-1.88%</b> |
| Croatian wolf | Chinese wolf  | Boxer        | 203311;<br>32.95%;<br>0.43%                       | 202091;<br>32.76%;<br>-0.32% | 211562;<br>34.29%;<br>-0.11%                      | 200348;<br>32.66%;<br>0.14%                       | 198041;<br>32.28%;<br>-0.80%                      | 215078;<br>35.06%;<br>0.66%                       | 204468;<br>33.45%;<br>0.93%  | 203864;<br>33.35%;<br>0.27% | 202947;<br>33.20%;<br>-1.20%                      |
| Croatian wolf | Chinese wolf  | Dingo        | 213747;<br>34.53%;<br>0.57%                       | 196438;<br>31.74%;<br>-0.75% | 208747;<br>33.73%;<br>0.18%                       | 209895;<br>34.22%;<br>0.25%                       | 193324;<br>31.52%;<br>-0.97%                      | 210107;<br>34.26%;<br>0.71%                       | 210931;<br>34.50%;<br>0.53%  | 201135;<br>32.90%;<br>0.41% | 199265;<br>32.60%;<br>-0.95%                      |
| Croatian wolf | Chinese wolf  | Basenji      | 205710;<br>33.27%;<br>0.48%                       | 201464;<br>32.58%;<br>-0.32% | 211167;<br>34.15%;<br>-0.15%                      | 201556;<br>32.84%;<br>0.05%                       | 196880;<br>32.08%;<br>-0.82%                      | 215250;<br>35.07%;<br>0.77%                       | 203801;<br>33.28%;<br>0.49%  | 204552;<br>33.41%;<br>0.50% | 203964;<br>33.31%;<br>-1.00%                      |
| Chinese wolf  | Israeli wolf  | Boxer        | <b>208018;</b><br><b>33.51%;</b><br><b>-1.91%</b> | 205083;<br>32.54%;<br>0.56%  | 207667;<br>33.45%;<br>1.35%                       | 210840;<br>34.03%;<br>-1.38%                      | 204758;<br>33.05%;<br>0.58%                       | 203911;<br>32.91%;<br>0.81%                       | 210065;<br>34.00%;<br>-1.42% | 209596;<br>33.92%;<br>1.45% | 198217;<br>32.08%;<br>-0.03%                      |
| Chinese wolf  | Israeli wolf  | Dingo        | 200720;<br>32.34%;<br>-1.03%                      | 215312;<br>34.69%;<br>-0.04% | 204645;<br>32.97%;<br>1.07%                       | 200301;<br>32.34%;<br>-1.03%                      | 217224;<br>35.07%;<br>0.34%                       | 201859;<br>32.59%;<br>0.69%                       | 204194;<br>33.06%;<br>-0.31% | 217493;<br>35.21%;<br>0.49% | 195969;<br>31.73%;<br>-0.18%                      |
| Chinese wolf  | Israeli wolf  | Basenji      | <b>216436;</b><br><b>34.81%;</b><br><b>-1.62%</b> | 202781;<br>32.61%;<br>0.35%  | 202571;<br>32.58%;<br>1.27%                       | 217724;<br>35.14%;<br>-1.29%                      | 201865;<br>32.58%;<br>0.32%                       | 199982;<br>32.28%;<br>0.96%                       | 218547;<br>35.38%;<br>-1.05% | 204447;<br>33.10%;<br>0.84% | 194752;<br>31.53%;<br>0.21%                       |
| Basenji       | Dingo         | Boxer        | 190695;<br>31.36%;<br>-1.06%                      | 242304;<br>39.85%;<br>0.69%  | 175036;<br>28.79%;<br>0.36%                       | <b>244189;</b><br><b>40.10%;</b><br><b>7.69%</b>  | <b>219636;</b><br><b>36.07%;</b><br><b>-3.08%</b> | <b>145058;</b><br><b>23.82%;</b><br><b>-4.60%</b> | 192265;<br>31.81%;<br>-0.60% | 237327;<br>39.27%;<br>0.12% | 174739;<br>28.91%;<br>0.49%                       |
| Chinese Wolf  | Croatian Wolf | Israeli Wolf | 208874;<br>33.63%;<br>-1.06%                      | 203245;<br>32.73%;<br>1.28%  | 208912;<br>33.64%;<br>-0.22%                      | 206703;<br>33.38%;<br>-1.32%                      | 198457;<br>32.05%;<br>0.61%                       | 214034;<br>34.57%;<br>0.71%                       | 204824;<br>33.27%;<br>-1.43% | 200458;<br>32.56%;<br>1.12% | 210316;<br>34.16%;<br>0.31%                       |

**Absolute Error:**

**0.4298**

**0.8219**

**0.4668**
