# Supplementary material for: Genome Sequencing Highlights the Dynamic Early History of Dogs
Source: PubMed Central journal article supplement (PMC3894170; doi:10.1371/journal.pgen.1004016), 2014-01-16
Supplement: pgen.1004016.s017.pdf [file pgen.1004016.s017.pdf]

**Table S11.** Estimation of post-divergence gene flow using the D Statistic [18]. The outgroup in all comparisons is the golden jackal. Statistical significance is evaluated using a two-tailed Z test, with the additional requirement that that absolute value of the Z-score to be  $\geq 3$ . Significant tests and sample pairs showing evidence for post-divergence gene flow are shown in bold.

| P1                  | P2                  | P3                  | ABBA Sites | BABA Sites | D (%)  | SE (%) | Z             | p-value                      |
|---------------------|---------------------|---------------------|------------|------------|--------|--------|---------------|------------------------------|
| Basenji             | Dingo               | Croatian wolf       | 164211     | 162364     | 0.57%  | 0.40%  | 1.42          | 0.16                         |
| <b>Basenji</b>      | Dingo               | <b>Israeli wolf</b> | 158610     | 179656     | -6.22% | 0.51%  | <b>-12.21</b> | <b>2.79x10<sup>-34</sup></b> |
| Boxer               | Basenji             | Croatian wolf       | 144942     | 146113     | -0.40% | 0.46%  | -0.88         | 0.38                         |
| Boxer               | <b>Basenji</b>      | <b>Israeli wolf</b> | 157007     | 147991     | 2.96%  | 0.52%  | <b>5.64</b>   | <b>1.67x10<sup>-8</sup></b>  |
| Boxer               | Dingo               | Croatian wolf       | 177485     | 176031     | 0.41%  | 0.44%  | 0.94          | 0.35                         |
| <b>Boxer</b>        | Dingo               | <b>Israeli wolf</b> | 176511     | 189294     | -3.49% | 0.52%  | <b>-6.71</b>  | <b>1.96x10<sup>-11</sup></b> |
| Croatian wolf       | <b>Israeli wolf</b> | <b>Boxer</b>        | 226123     | 210897     | 3.48%  | 0.65%  | <b>5.33</b>   | <b>9.86x10<sup>-8</sup></b>  |
| Croatian wolf       | Israeli wolf        | Dingo               | 213742     | 212876     | 0.20%  | 0.54%  | 0.38          | 0.71                         |
| Croatian wolf       | <b>Israeli wolf</b> | <b>Basenji</b>      | 205695     | 182191     | 6.06%  | 0.62%  | <b>9.74</b>   | <b>1.99x10<sup>-22</sup></b> |
| Basenji             | <b>Dingo</b>        | <b>Chinese wolf</b> | 173366     | 162030     | 3.38%  | 0.45%  | <b>7.49</b>   | <b>6.76x10<sup>-14</sup></b> |
| Boxer               | Basenji             | Chinese wolf        | 149172     | 147273     | 0.64%  | 0.41%  | 1.54          | 0.12                         |
| Boxer               | <b>Dingo</b>        | <b>Chinese wolf</b> | 192400     | 175946     | 4.47%  | 0.44%  | <b>10.14</b>  | <b>3.77x10<sup>-24</sup></b> |
| Croatian wolf       | Chinese wolf        | Boxer               | 216145     | 219859     | -0.85% | 0.42%  | -2.02         | 4.32x10 <sup>-2</sup>        |
| Croatian wolf       | <b>Chinese wolf</b> | <b>Dingo</b>        | 221737     | 212060     | 2.23%  | 0.44%  | <b>5.10</b>   | <b>3.48x10<sup>-7</sup></b>  |
| Croatian wolf       | Chinese wolf        | Basenji             | 190706     | 191336     | -0.16% | 0.39%  | -0.42         | 0.68                         |
| Chinese wolf        | <b>Israeli wolf</b> | <b>Boxer</b>        | 242452     | 222327     | 4.33%  | 0.68%  | <b>6.41</b>   | <b>1.43x10<sup>-10</sup></b> |
| <b>Chinese wolf</b> | Israeli wolf        | <b>Dingo</b>        | 223003     | 232071     | -1.99% | 0.56%  | <b>-3.58</b>  | <b>3.48x10<sup>-4</sup></b>  |
| Chinese wolf        | <b>Israeli wolf</b> | <b>Basenji</b>      | 216213     | 191475     | 6.07%  | 0.64%  | <b>9.50</b>   | <b>2.02x10<sup>-21</sup></b> |
