# Supplementary material for: Genome Sequencing Highlights the Dynamic Early History of Dogs
Source: PubMed Central journal article supplement (PMC3894170; doi:10.1371/journal.pgen.1004016), 2014-01-16
Supplement: pgen.1004016.s018.pdf [file pgen.1004016.s018.pdf]

**Table S12. Main set of parameter estimates in *G-PhoCS* analysis.**

| Parameter            | Raw estimate $\times 10^4$ | Calibrated <sup>a</sup> | Parameter                                 | Raw estimate $\times 10^4$ | Calibrated <sup>a</sup>   |
|----------------------|----------------------------|-------------------------|-------------------------------------------|----------------------------|---------------------------|
| $N_{\text{BSJ}}$     | 1.1 (0.9–1.2)              | 2,639 (2,322–2,942)     | $T_{\text{ancDOG1}}$                      | 0.40 (0.36–0.44)           | 12,102 (10,932–13,074)    |
| $N_{\text{DNG}}$     | 0.8 (0.7–0.8)              | 1,914 (1,760–2,080)     | $T_{\text{ancDOG}}$                       | 0.43 (0.39–0.46)           | 12,795 (11,736–13,701)    |
| $N_{\text{ISW}}$     | 10.4 (8.6–12.3)            | 26,092 (21,611–30,732)  | $T_{\text{ancWLF1}}$                      | 0.45 (0.39–0.50)           | 13,389 (11,688–14,982)    |
| $N_{\text{CRW}}$     | 4.6 (3.9–5.2)              | 11,427 (9,835–12,968)   | $T_{\text{ancWLF}}$                       | 0.45 (0.39–0.50)           | 13,455 (11,766–15,060)    |
| $N_{\text{CHW}}$     | 2.2 (1.9–2.4)              | 5,426 (4,733–6,087)     | $T_{\text{ancDW}}$                        | 0.50 (0.46–0.53)           | 14,874 (13,875–15,900)    |
| $N_{\text{GLJ}}$     | 7.8 (7.5–8.1)              | 19,446 (18,746–20,139)  | $T_{\text{root}}$                         | 13.3 (12.7–13.8)           | 398,262 (381,927–415,086) |
| $N_{\text{ancDOG1}}$ | 0.3 (0.0–0.8)              | 793 (66–1,990)          | $m_{\text{ISW} \rightarrow \text{BSJ}}$   | 0.18 (0.12–0.24)           |                           |
| $N_{\text{ancDOG}}$  | 0.8 (0.3–1.3)              | 1,999 (701–3,200)       | $m_{\text{BSJ} \rightarrow \text{ISW}}$   | 0.07 (0.06–0.09)           |                           |
| $N_{\text{ancWLF1}}$ | 0.6 (0.0–1.3)              | 1,393 (44–3,327)        | $m_{\text{CHW} \rightarrow \text{DNG}}$   | 0.03 (0.00–0.06)           |                           |
| $N_{\text{ancWLF}}$  | 5.1 (0.4–10.0)             | 12,627 (981–24,991)     | $m_{\text{DNG} \rightarrow \text{CHW}}$   | 0.04 (0.02–0.06)           |                           |
| $N_{\text{ancDW}}$   | 18 (17.7–18.3)             | 44,993 (44,205–45,812)  | $m_{\text{GLJ} \rightarrow \text{ISW}}$   | 0.00 (0.00–0.00)           |                           |
| $N_{\text{root}}$    | 7.3 (6.5–8.0)              | 18,169 (16,311–19,990)  | $m_{\text{ISW} \rightarrow \text{GLJ}}$   | 0.05 (0.04–0.06)           |                           |
|                      |                            |                         | $m_{\text{GLJ} \rightarrow \text{ancDW}}$ | 0.02 (0.01–0.03)           |                           |
|                      |                            |                         | $m_{\text{ancDW} \rightarrow \text{GLJ}}$ | 0.99 (0.89–1.10)           |                           |

<sup>a</sup> Absolute parameter values are obtained by assuming an average mutation rate of  $m=1.0 \times 10^{-8}$  mutations per site per generation and an average generation time of three years (see Text S9).
