# Supplementary material for: Genome Sequencing Highlights the Dynamic Early History of Dogs
Source: PubMed Central journal article supplement (PMC3894170; doi:10.1371/journal.pgen.1004016), 2014-01-16
Supplement: pgen.1004016.s019.pdf [file pgen.1004016.s019.pdf]

**Table S13.** qPCR results for copy number at *AMY2B* for 52 breed dogs, 6 Dingoes, and 40 wolves representing their global distribution.

| <b>Breed/Population</b> | <b>SampleID</b> | <b>RKW#</b> | <b>CN Calculated</b> | <b>CN Predicted</b> | <b>Min CN</b> | <b>Max CN</b> | <b>CN Range</b> | <b>Replicates Analyzed</b> |
|-------------------------|-----------------|-------------|----------------------|---------------------|---------------|---------------|-----------------|----------------------------|
| Afghan Hound            | ODL13172        | 14137       | 10.58                | 10                  | 9.64          | 11.69         | 2.05            | 3                          |
| Afghan Hound            | ODL10621        | 14117       | 7.80                 | 8                   | 7.62          | 7.99          | 0.37            | 2                          |
| Afghan Hound            | ODL10626        | 14118       | 19.43                | 19                  | 14.73         | 33.15         | 18.42           | 3                          |
| Afghan Hound            | ODL10623        | 4385        | 12.91                | 13                  | 12.07         | 14.09         | 2.02            | 3                          |
| Afghan Hound            | ODL10624        | 4386        | 14.30                | 14                  | 14.30         | 14.30         | 0.00            | 1                          |
| Africanis               | 9328            | 4156        | 12.47                | 12                  | 10.16         | 15.31         | 5.16            | 2                          |
| Africanis               | 9334            | 4157        | 14.03                | 14                  | 14.03         | 14.03         | 0.00            | 1                          |
| Akita                   | ODL12758        | 14130       | 7.66                 | 8                   | 5.08          | 9.58          | 4.50            | 3                          |
| Akita                   | ODL1103         | 4343        | 5.92                 | 6                   | 5.47          | 6.25          | 0.78            | 3                          |
| Akita                   | ODL1131         | 4344        | 6.42                 | 6                   | 6.13          | 6.72          | 0.58            | 2                          |
| Basenji                 | 6968            | 4176        | 13.19                | 13                  | 12.25         | 14.20         | 1.94            | 2                          |
| Basenji                 | ODL4222         | 4353        | 18.38                | 18                  | 18.38         | 18.38         | 0.00            | 1                          |
| Basenji                 | ODL4226         | 4354        | 8.27                 | 8                   | 7.21          | 9.48          | 2.27            | 2                          |
| Basenji                 | Basenji1        | 5361        | 7.18                 | 7                   | 6.26          | 7.96          | 1.71            | 3                          |
| Basenji                 |                 | 13477       | 16.87                | 17                  | 13.07         | 18.98         | 5.91            | 2                          |
| Beagle                  | 5 Erica         |             | 5.54                 | 5                   | 5.11          | 5.95          | 0.84            | 3                          |
| Bulldog                 | 8 Erica         |             | 14.18                | 14                  | 12.60         | 15.96         | 3.36            | 2                          |
| Canaan Dog              | 11916           | 4168        | 11.38                | 11                  | 11.12         | 11.65         | 0.52            | 2                          |
| Canaan Dog              | 11910           | 4163        | 6.28                 | 6                   | 5.14          | 7.26          | 2.12            | 3                          |
| Chihuahua               | 2 Erica         |             | 9.87                 | 10                  | 9.77          | 9.97          | 0.2             | 3                          |
| Chinese Crested         | Sizzle          | 2701        | 15.47                | 15                  | 15.47         | 15.47         | 0.00            | 1                          |
| Flat-coated Retriever   | 4 Erica         |             | 11.94                | 12                  | 10.64         | 13.83         | 3.18            | 3                          |
| Great Dane              | 11 Erica        |             | 17.49                | 17                  | 16.44         | 18.61         | 2.17            | 2                          |
| Ibizan Hound            | ODL1228         | 4349        | 17.69                | 18                  | 15.32         | 20.43         | 5.11            | 2                          |
| Kuvasz                  | ODL7526         | 4368        | 17.30                | 17                  | 16.81         | 17.81         | 1.00            | 2                          |
| Kuvasz                  | ODL7525         | 4367        | 7.39                 | 7                   | 6.25          | 9.71          | 3.46            | 3                          |
| Mastiff                 | ODL2297         | 4351        | 8.48                 | 8                   | 7.04          | 12.26         | 5.22            | 3                          |

|                        |               |       |       |    |       |       |      |   |
|------------------------|---------------|-------|-------|----|-------|-------|------|---|
| Mastiff                | ODL2298       | 4390  | 11.56 | 11 | 9.95  | 13.94 | 3.99 | 3 |
| Mastiff                | 6 Erica       |       | 7.99  | 8  | 6.81  | 8.90  | 2.09 | 3 |
| New Guinea Singing Dog | Hali          | 4155  | 11.09 | 11 | 10.04 | 12.25 | 2.21 | 2 |
| New Guinea Singing Dog | Tilley 8 & 15 | 4186  | 10.91 | 11 | 8.86  | 12.27 | 3.41 | 3 |
| Pekingese              | ODL1219       | 4348  | 15.21 | 15 | 11.26 | 19.16 | 7.90 | 3 |
| Pekingese              | ODL1212       | 4347  | 12.21 | 12 | 10.33 | 14.42 | 4.09 | 2 |
| Pekingese              | 9 Erica       |       | 10.04 | 10 | 7.11  | 13.57 | 6.46 | 3 |
| Phu Quoc               | VII Phu Quoc  | 5363  | 14.82 | 15 | 12.81 | 17.14 | 4.33 | 2 |
| Saluki                 | 1 erica       |       | 22.64 | 23 | 22.64 | 22.64 | 0    | 1 |
| Saluki                 | 493           | 4182  | 16.64 | 17 | 16.64 | 16.64 | 0.00 | 1 |
| Saluki                 | 1052          | 4183  | 33.50 | 34 | 33.50 | 33.50 | 0.00 | 1 |
| Samoyed                | ODL14507      | 14141 | 5.35  | 5  | 5.20  | 5.63  | 0.43 | 3 |
| Samoyed                | 7402-5        | 5358  | 12.62 | 13 | 11.39 | 13.99 | 2.6  | 2 |
| Samoyed                | ODL14503      | 14140 | 4.50  | 4  | 2.89  | 6.94  | 4.05 | 3 |
| Samoyed                | ODL14535      | 14142 | 17.15 | 17 | 17.15 | 17.15 | 0.00 | 1 |
| Samoyed                | SSAM-6        | 5356  | 14.46 | 14 | 14.46 | 14.46 | 0.00 | 1 |
| Scottish Terrier       | 7 Erica       |       | 8.28  | 8  | 6.92  | 9.91  | 2.99 | 2 |
| Shar Pei               | ODL11439      | 14123 | 12.64 | 13 | 11.94 | 13.53 | 1.59 | 3 |
| Shar Pei               | ODL11440      | 14124 | 7.99  | 8  | 7.30  | 9.50  | 2.20 | 3 |
| Shar Pei               | ODL11448      | 14126 | 14.17 | 14 | 12.45 | 15.41 | 2.96 | 3 |
| Shar Pei               | ODL11441      | 14125 | 16.59 | 16 | 12.90 | 21.35 | 8.46 | 2 |
| Siberian husky         | ODL11489      | 14127 | 7.37  | 7  | 6.43  | 8.32  | 1.88 | 3 |
| Siberian husky         | 3 Erica       |       | 2.53  | 3  | 2.05  | 3.05  | 0.99 | 3 |
| Thai Dog               | VI Thai dog   | 5362  | 8.84  | 9  | 7.52  | 10.55 | 3.03 | 3 |
| Toy Poodle             | 10 Erica      |       | 9.94  | 10 | 9.60  | 10.59 | 0.99 | 3 |
| Dingo                  | Yindi         | 5317  | 5.29  | 5  | 4.61  | 5.89  | 1.28 | 3 |
| Dingo                  | FC-4164       | 5316  | 2.51  | 2  | 1.98  | 3.60  | 1.62 | 3 |
| Dingo                  | Pickle        | 5318  | 1.77  | 2  | 1.09  | 2.74  | 1.64 | 3 |
| Dingo                  | Mustard       | 5319  | 2.04  | 2  | 1.90  | 2.29  | 0.39 | 3 |
| Dingo                  | N723          |       | 1.94  | 2  | 1.47  | 2.41  | 0.95 | 3 |
| Dingo                  |               | 13760 | 2.72  | 3  | 2.52  | 2.91  | 0.39 | 3 |
| Wolf (China)           | BK14          | 14170 | 2.96  | 3  | 2.59  | 3.65  | 1.05 | 3 |
| Wolf (China)           | BK5           | 14172 | 2.94  | 3  | 2.34  | 3.40  | 1.06 | 3 |

|                    |           |       |      |   |      |      |      |   |
|--------------------|-----------|-------|------|---|------|------|------|---|
| Wolf (China)       | 12        | 645   | 4.09 | 4 | 3.64 | 4.70 | 1.06 | 3 |
| Wolf (China)       | bk05      | 13448 | 2.23 | 2 | 1.95 | 2.73 | 0.78 | 3 |
| Wolf (China)       |           | 3916  | 1.89 | 2 | 1.76 | 2.02 | 0.25 | 2 |
| Wolf (India)       |           | 3942  | 2.75 | 3 | 2.50 | 3.06 | 0.56 | 3 |
| Wolf (Israel)      | B         | 1413  | 4.26 | 4 | 2.71 | 7.94 | 5.23 | 3 |
| Wolf (Israel)      | 1         | 1415  | 1.69 | 2 | 1.12 | 2.14 | 1.02 | 3 |
| Wolf (Israel)      | 44        | 1420  | 4.51 | 4 | 4.50 | 4.51 | 0.00 | 2 |
| Wolf (Israel)      | 11122     | 2580  | 2.02 | 2 | 1.93 | 2.11 | 0.18 | 3 |
| Wolf (Italy)       | W525      | 2785  | 1.78 | 2 | 1.42 | 2.02 | 0.60 | 3 |
| Wolf (Italy)       | W794      | 2794  | 1.88 | 2 | 1.81 | 2.02 | 0.20 | 3 |
| Wolf (Italy)       | W755      | 2799  | 1.87 | 2 | 1.69 | 2.03 | 0.34 | 3 |
| Wolf (Italy)       | W509      | 2781  | 2.03 | 2 | 1.74 | 2.24 | 0.50 | 3 |
| Wolf (Italy)       | ITA50     |       | 1.96 | 2 | 1.64 | 2.48 | 0.84 | 3 |
| Wolf (Russia)      | W295      | 1983  | 2.94 | 3 | 2.35 | 3.81 | 1.46 | 3 |
| Wolf (Russia)      | W780      | 1992  | 1.88 | 2 | 1.63 | 2.08 | 0.45 | 3 |
| Wolf (Russia)      | W523      | 1997  | 2.48 | 2 | 1.88 | 2.87 | 0.99 | 3 |
| Wolf (Russia)      | W437      | 2004  | 2.69 | 3 | 2.16 | 3.55 | 1.39 | 3 |
| Wolf (Russia)      | W289      | 2006  | 1.92 | 2 | 1.78 | 2.00 | 0.23 | 3 |
| Wolf (Russia)      | W620      | 1974  | 1.60 | 2 | 1.52 | 1.68 | 0.16 | 3 |
| Wolf (Spain)       | WIB11086A |       | 2.03 | 2 | 1.92 | 2.27 | 0.35 | 3 |
| Wolf (Spain)       | WIB11090  |       | 3.54 | 4 | 3.19 | 3.89 | 0.7  | 3 |
| Wolf (Spain)       | WIB13     |       | 1.83 | 2 | 1.60 | 2.02 | 0.42 | 3 |
| Wolf (Spain)       | WIB18     |       | 2.64 | 2 | 2.13 | 3.32 | 1.19 | 3 |
| Wolf (Spain)       | WIB19     |       | 2.44 | 2 | 1.90 | 3.51 | 1.61 | 3 |
| Wolf (Spain)       | WIB21     |       | 2.62 | 2 | 2.43 | 2.91 | 0.48 | 3 |
| Wolf (Spain)       | Wib57     |       | 1.85 | 2 | 1.67 | 2.09 | 0.42 | 3 |
| Wolf (Spain)       | Wib60     |       | 1.60 | 2 | 1.31 | 2.06 | 0.75 | 3 |
| Wolf (Spain)       | WIB64     |       | 1.78 | 2 | 1.42 | 2.12 | 0.7  | 3 |
| Wolf (Spain)       | Wib74a    |       | 3.72 | 4 | 3.53 | 3.86 | 0.33 | 3 |
| Wolf (Spain)       | WIB98     |       | 7.76 | 8 | 6.43 | 8.83 | 2.40 | 3 |
| Wolf (Sweden)      | 3220      |       | 1.47 | 2 | 1.34 | 1.61 | 0.27 | 2 |
| Wolf (Yellowstone) | 260F      | 921   | 3.92 | 4 | 3.20 | 4.50 | 1.30 | 3 |
| Wolf (Yellowstone) | 292M      | 931   | 4.66 | 4 | 3.62 | 5.54 | 1.93 | 3 |

|                    |      |      |      |   |      |      |      |   |
|--------------------|------|------|------|---|------|------|------|---|
| Wolf (Yellowstone) | 383M | 960  | 5.51 | 5 | 4.57 | 6.27 | 1.70 | 3 |
| Wolf (Yellowstone) | 040F | 969  | 2.15 | 2 | 1.88 | 2.47 | 0.58 | 3 |
| Wolf (Yellowstone) |      | 1547 | 2.92 | 3 | 2.09 | 4.10 | 2.01 | 3 |
| Wolf (Yellowstone) |      | 1548 | 2.31 | 2 | 1.62 | 3.42 | 1.80 | 3 |
| Wolf (Great Lakes) |      | 2455 | 3.29 | 3 | 3.00 | 3.48 | 0.47 | 3 |
| Red Wolf           |      | 7874 | 2.24 | 2 | 2.13 | 2.47 | 0.34 | 3 |
| Coyote             |      | 2430 | 2.55 | 2 | 2.25 | 3.09 | 0.85 | 3 |

---
